# Supplementary material for: Light regulates stomatal development by modulating paracrine signaling from inner tissues
Source: PubMed Central journal article supplement (PMC8184810; doi:10.1038/s41467-021-23728-2), 2021-06-07
Supplement: 41467_2021_23728_MOESM1_ESM.pdf [file 41467_2021_23728_MOESM1_ESM.pdf]

## Supplementary Information

### Light regulates stomatal development by modulating paracrine signaling from inner tissues

Shenqi Wang<sup>†,‡</sup>, Zimin Zhou<sup>†</sup>, Rini Rahiman, Grace Sheen Yee Lee, Yuan Kai Yeo, Xin Yang and On Sun Lau\*

Department of Biological Sciences, National University of Singapore, 14 Science Drive 4, Singapore 117543, Singapore

<sup>†</sup>These authors contributed equally to this work

<sup>‡</sup>Present address: Department of Molecular, Cellular and Developmental Biology, Yale University, New Haven, CT 06520, USA

\*Correspondence should be addressed to O.S.L. (email: [onsunlau@nus.edu.sg](mailto:onsunlau@nus.edu.sg))

#### List of supplementary figures and tables

Supplementary Fig. 1. Effect of light intensity on stomatal development in *hyh-1* and the double mutants *hy5-51 hyh-1* and *hyh-1 cop1-6*.

Supplementary Fig. 2. Effect of light intensity on stomatal development in *cop1-6* and the double mutant *hy5-215 cop1-6*.

Supplementary Fig. 3. Gene expression analysis of two direct targets of SPCH in WT and *hy5* mutant during dark to light transition.

Supplementary Fig. 4. Analysis of a MAPK-insensitive translational reporter of *SPCH* in *hy5* mutant.

Supplementary Fig. 5. Genetic interaction between *HY5* and *SPCH*.

Supplementary Fig. 6. Expression analyses of the *STOMAGEN-VENUS* line in WT and *hy5*.

Supplementary Fig. 7. *GUS* reporter analyses of the promoter activity of *STOMAGEN* in wild-type and *hy5* mutant.

Supplementary Fig. 8. Expression pattern of a translational reporter of *HY5* in mesophyll and the epidermis.

Supplementary Fig. 9. Purification of recombinant HY5 proteins, additional EMSA assay of HY5 and expression dynamics of *HY5pro:HY5-YFP* during dark to light transition

Supplementary Fig. 10. Density of stomata in WT, *stomagen* and *hy5* mutants.

Supplementary Fig. 11. Confocal analyses of the mesophyll layer of *HY5pro:HY5-YFP* under low and high light.

Supplementary Fig. 12. Phenotypic analyses of hypocotyl growth of WT, *hy5-215*, *HY5-OX* and *HY5pro:HY5-YFP hy5-215*.

Supplementary Table 1. List of primers for RT-qPCR and CHIP-qPCR

Supplementary Table 2. List of probes for EMSAs and DNA pull-down assays

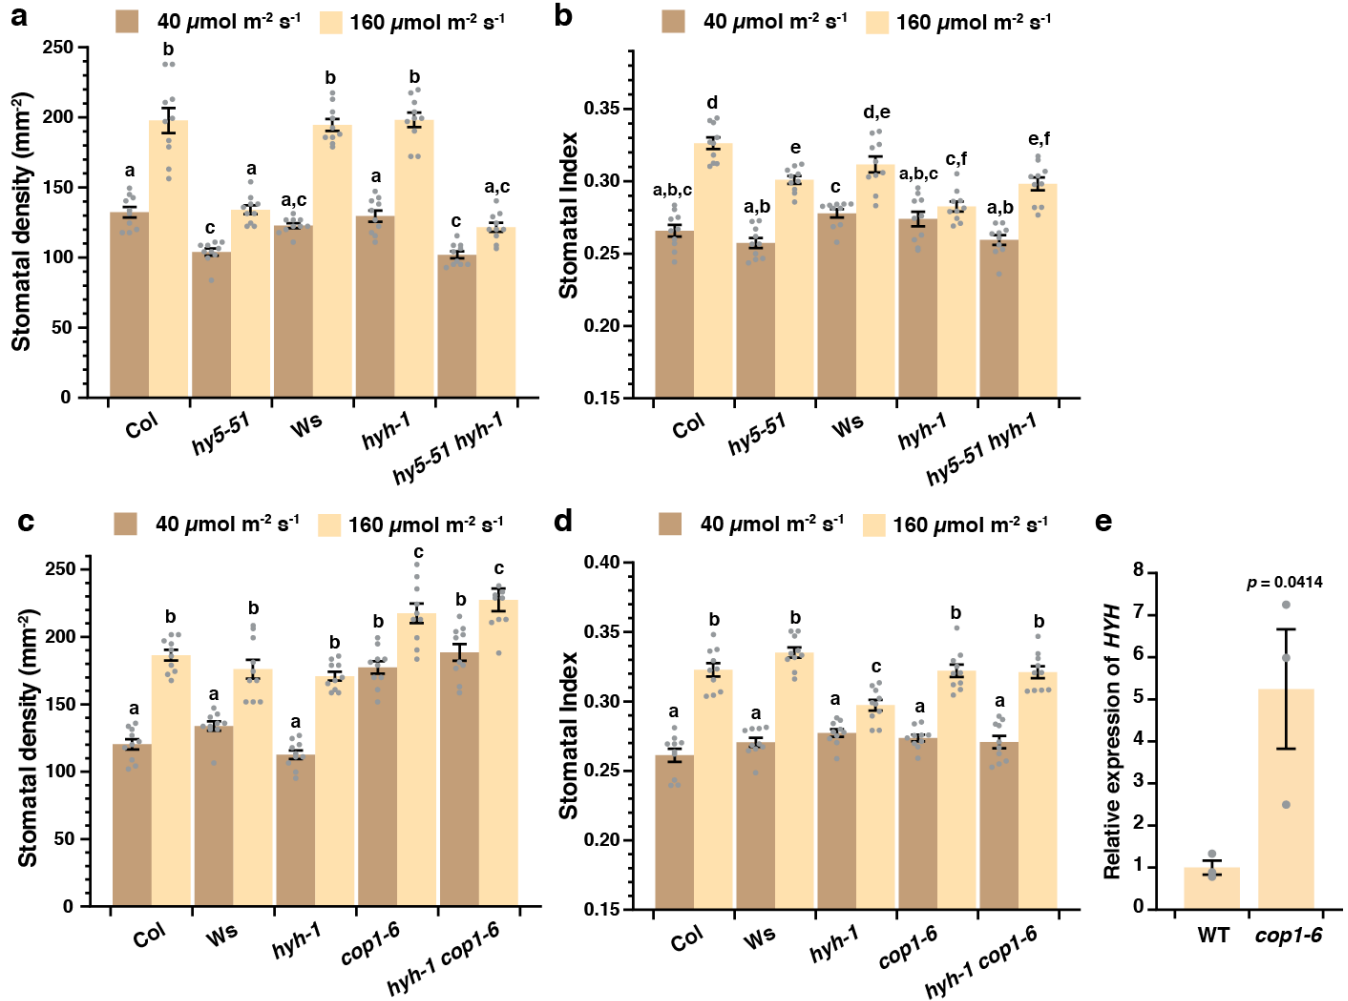

**Supplementary Fig. 1. Effect of light intensity on stomatal development in *hyh-1* and the double mutants *hy5-51 hyh-1* and *hyh-1 cop1-6*.** (a, b) Stomatal densities (a) and indices (b) of the abaxial cotyledons of 10-dpg seedlings of Col, *hy5-51*, Ws, *hyh1* and *hy5-51 hyh-1* grown under low (40  $\mu\text{mol m}^{-2} \text{s}^{-1}$ ) and high (160  $\mu\text{mol m}^{-2} \text{s}^{-1}$ ) light intensity. *hy5-51* and *hyh-1* are in Col and Ws ecotypes, respectively. (c, d) Stomatal densities (c) and indices (d) of the abaxial cotyledons of 10-dpg seedlings of Col, Ws, *hyh1*, *cop1-6* and *hyh-1 cop1-6* grown under low and high light (as above). (e) Gene expression analysis of *HYH* in WT and *cop1-6* by RT-qPCR. RNA was extracted from 3-day-old seedlings grown under 100  $\mu\text{mol m}^{-2} \text{s}^{-1}$  of light. Values are mean  $\pm$  SEM,  $n = 10$  independent cotyledons (a-d) or 3 biological replicates (e). Two-way ANOVA with Tukey's multiple comparisons test (a-d) or two-tailed Student's t-test (e),  $p < 0.05$ .

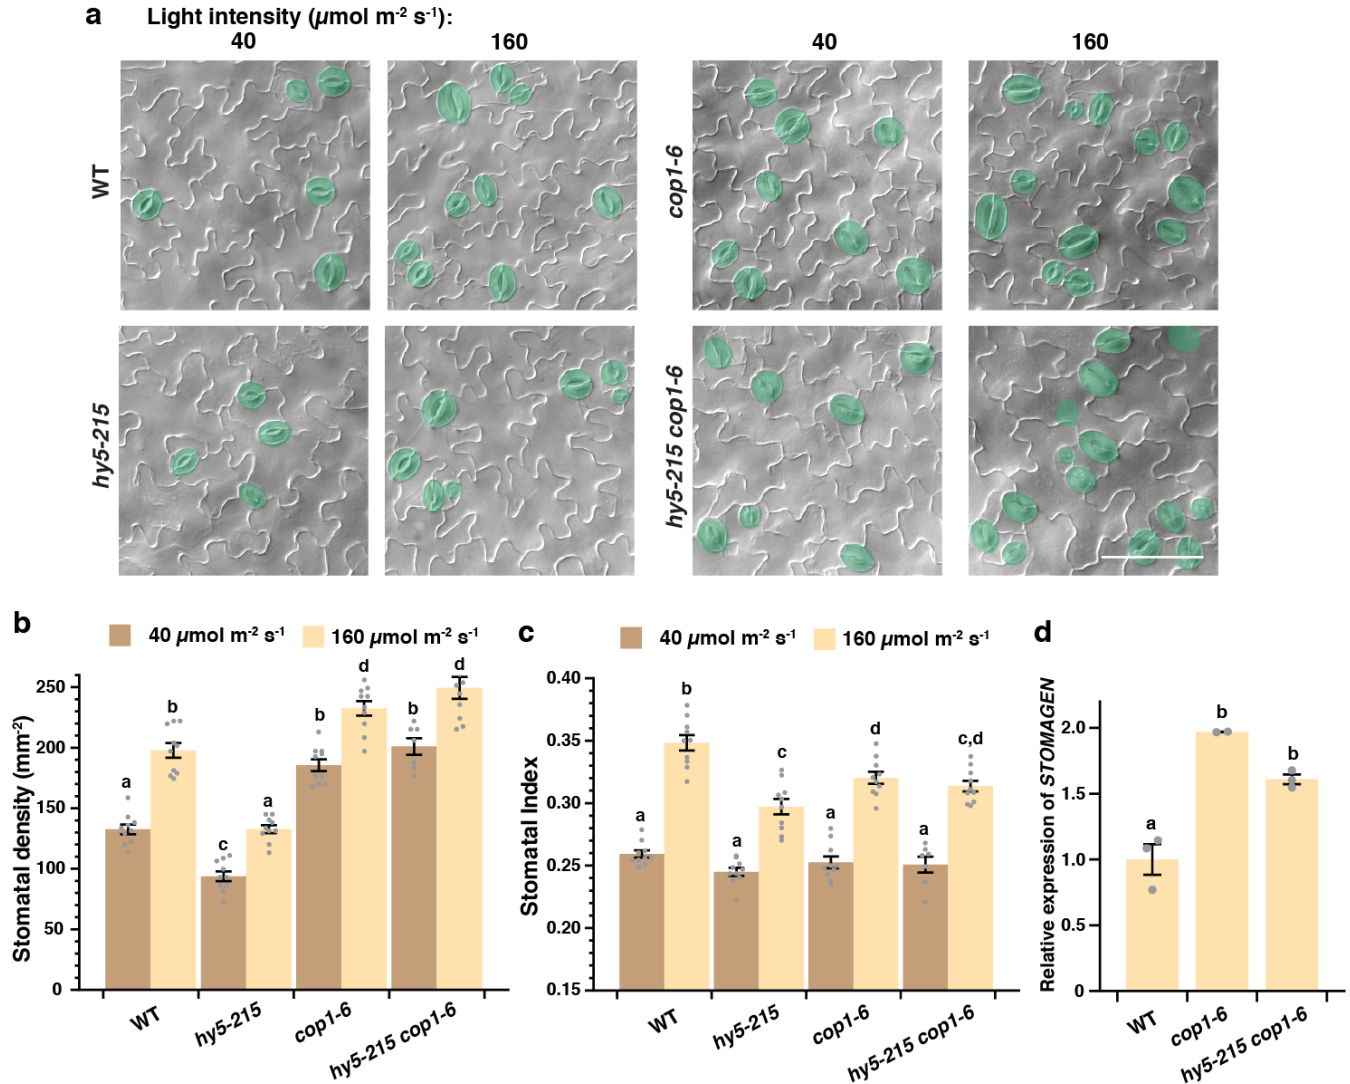

**Supplementary Fig. 2. Effect of light intensity on stomatal development in *cop1-6* and the double mutant *hy5-215 cop1-6*.** (a-c) Arabidopsis seedlings of WT, *hy5-215*, *cop1-6* and *hy5-215 cop1-6* were grown for 10 days at 22°C under two distinct light intensities (40 and 160  $\mu\text{mol m}^{-2} \text{s}^{-1}$ ). Representative images (a), stomatal densities (b) and stomatal indices (c) of the abaxial cotyledons are shown. Stomata are pseudo-colored in green (a). Scale bar, 80  $\mu\text{m}$ . (d) Gene expression analysis of *STOMAGEN* in the indicated genotypes. RNA was extracted from 3-day-old seedlings grown under 100  $\mu\text{mol m}^{-2} \text{s}^{-1}$  of light. Values are mean  $\pm$  SEM,  $n = 10$  independent cotyledons (b-c), 3 (d, WT & *hy5-215 cop1-6*) or 2 (d, *cop1-6*) biological replicates. Two-way (b, c) or one-way (d) ANOVA with Tukey's multiple comparisons test,  $p < 0.05$ .

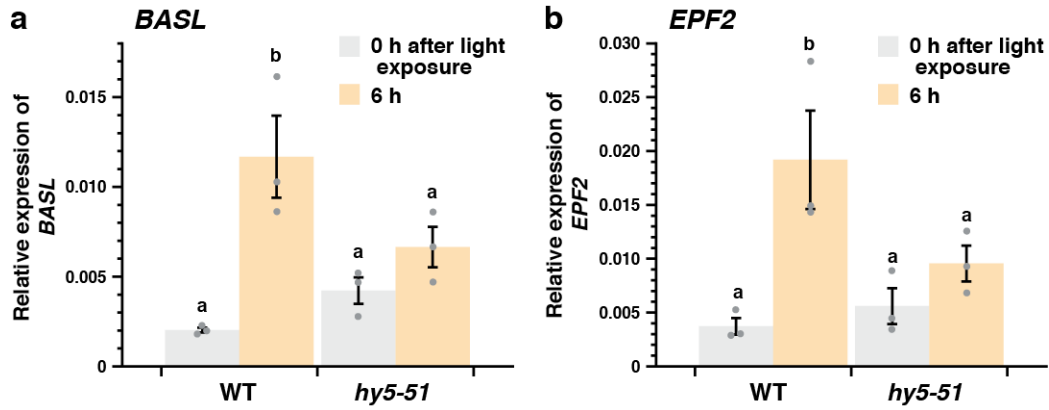

**Supplementary Fig. 3. Gene expression analysis of two direct targets of SPCH in WT and *hy5* mutant during dark to light transition.** Seedlings of WT and *hy5-51* were grown in darkness for 4 days and were exposed to light for 0 and 6 h before RNA extraction. RT-qPCR was performed to monitor the expression of *BASL* (a) and *EPF2* (b). Signals are normalized with *ACTIN2*. Values are mean  $\pm$  SEM,  $n = 3$  biological replicates. Two-way ANOVA with post-hoc Tukey HSD,  $p < 0.05$ .

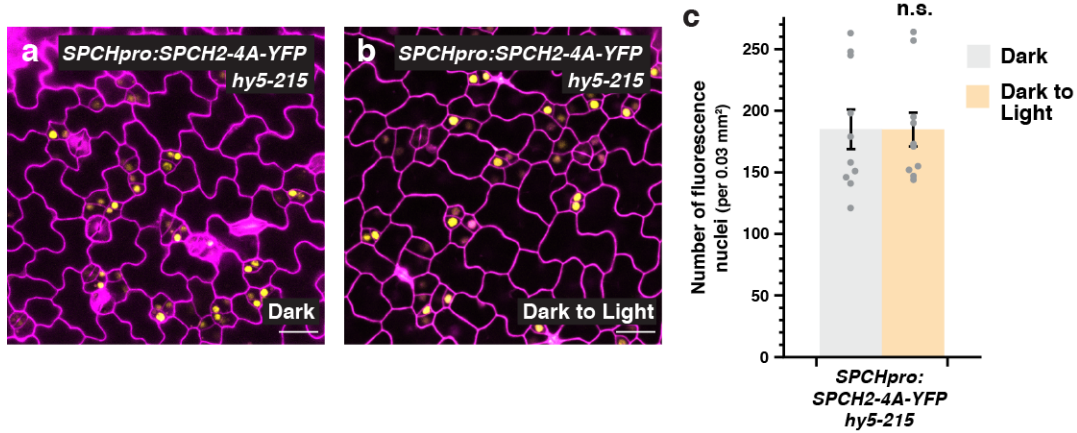

**Supplementary Fig. 4. Analysis of a MAPK-insensitive translational reporter of *SPCH* in *hy5* mutant.** Confocal images of 3-day-old abaxial cotyledons of *SPCHpro:SPCH2-4A-YFP* in *hy5-215* grown in darkness (a) or exposed to light (b) (see Fig. 2). The numbers of YFP-expressing cells (yellow) are quantified (c). Values are mean  $\pm$  SEM,  $n = 10$  independent cotyledons. Two-tailed Student's t-test, n.s., not significant. Cell outlines were visualized with propidium iodide (magenta). Scale bar, 20  $\mu\text{m}$ .

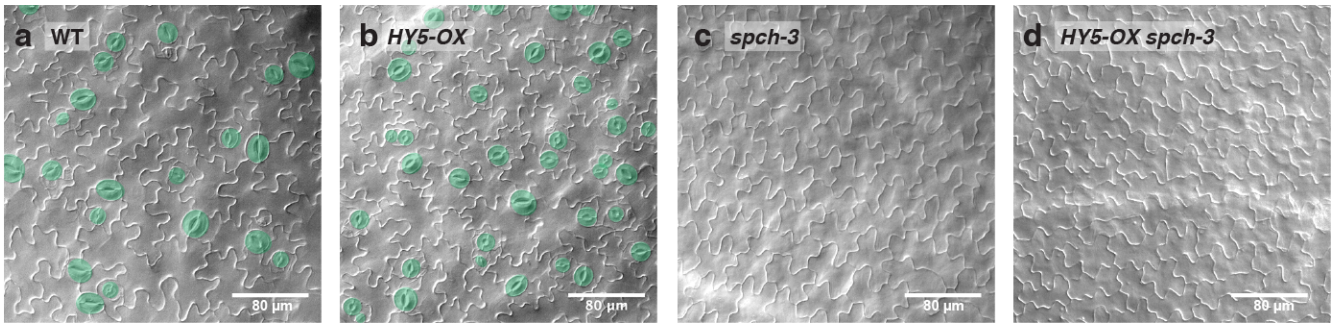

**Supplementary Fig. 5. Genetic interaction between *HY5* and *SPCH*.** Representative images of the epidermis of the adaxial cotyledons of WT (a), *HY5-OX* (b), *spch-3* (c) and the *HY5-OX spch-3* double mutants (d) are shown. Seedlings were grown for 10 days under light. Scale bar, 80  $\mu\text{m}$ . Three cotyledons from each genotype were examined with similar results.

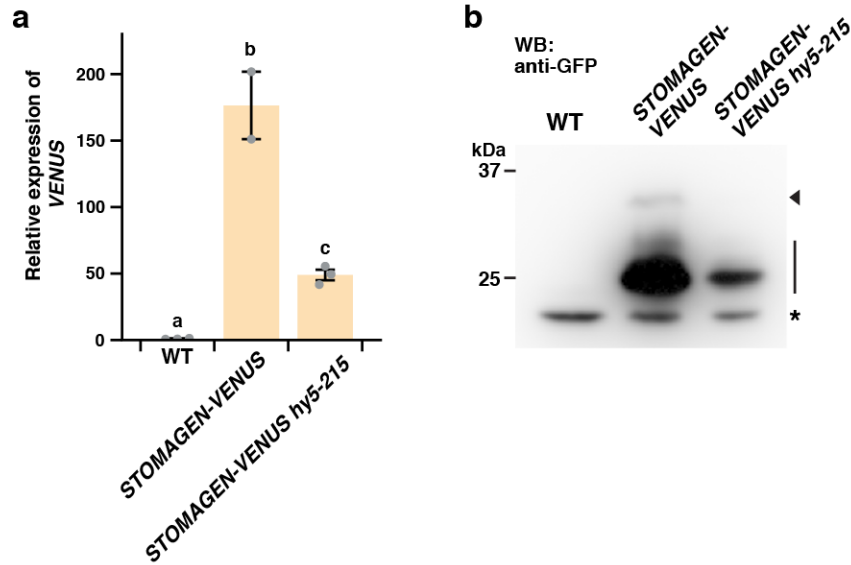

**Supplementary Fig. 6. Expression analyses of the *STOMAGEN-VENUS* line in WT and *hy5*.** (a) Expression analysis of the *VENUS* transcripts of 3-day-old light-grown seedlings of WT, *STOMAGEN*<sub>pro</sub>:*STOMAGEN-VENUS* and *STOMAGEN*<sub>pro</sub>:*STOMAGEN-VENUS* in *hy5-215* by RT-qPCR. RNA was extracted from 3-day-old seedlings grown under 100  $\mu\text{mol m}^{-2} \text{s}^{-1}$  of light. Values are mean  $\pm$  SEM,  $n = 3$  (WT & *STOMAGEN*<sub>pro</sub>:*STOMAGEN-VENUS* *hy5-215*) or 2 (*STOMAGEN*<sub>pro</sub>:*STOMAGEN-VENUS*) biological replicates. One-way ANOVA with Tukey's multiple comparisons test,  $p < 0.05$ . (b) Western blot analysis of a translational reporter of *STOMAGEN*. Total proteins were extracted from the above plant lines. Protein extracts were probed with an anti-GFP antibody. Arrowhead: full-length *STOMAGEN-VENUS*, Line: degraded products of *STOMAGEN-VENUS*, Asterisk: non-specific band. The experiment was repeated two times with similar results.

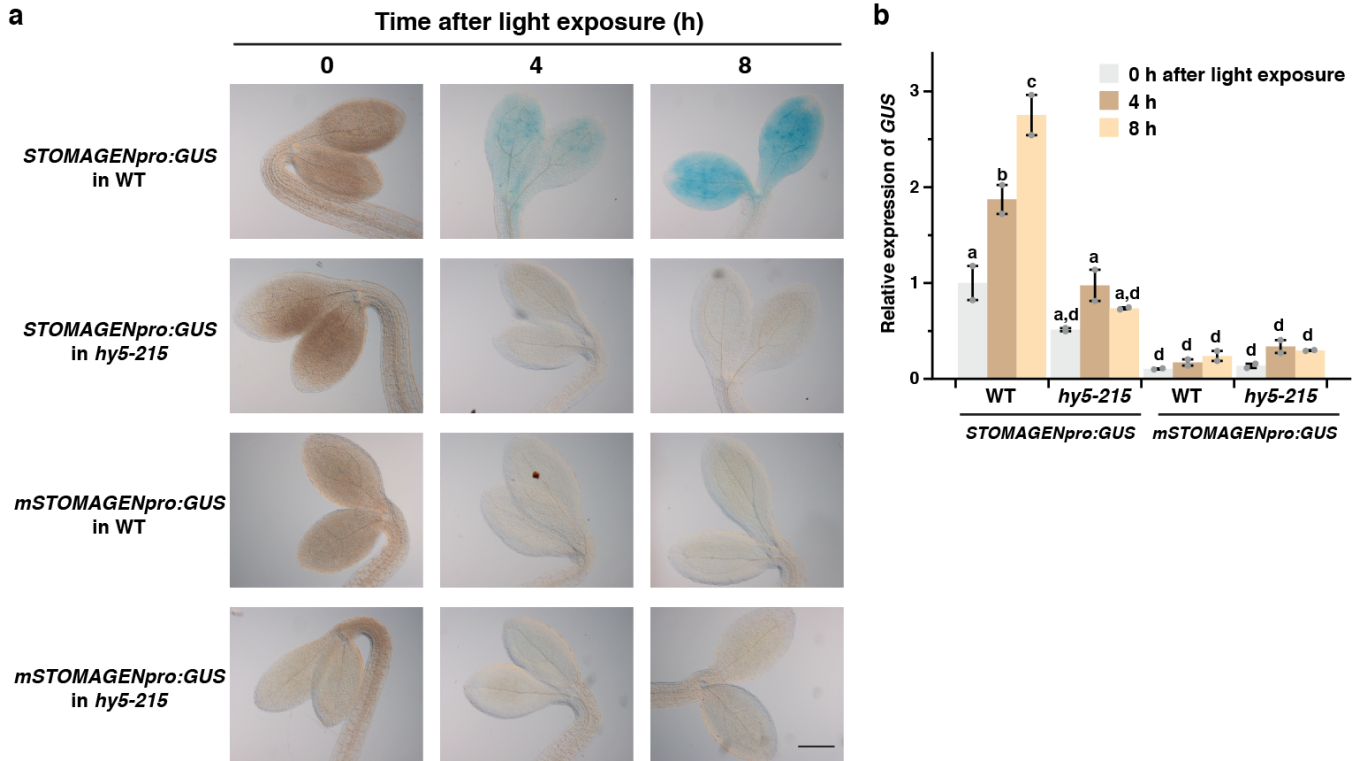

**Supplementary Fig. 7. GUS reporter analyses of the promoter activity of *STOMAGEN* in wild-type and *hy5* mutant.** (a) Histochemical GUS staining of the indicated *GUS* reporters in wild-type (WT) and in *hy5-215*. *STOMAGENpro:GUS* refers to a *GUS* reporter gene driven by the *STOMAGEN* promoter, whereas *mSTOMAGENpro:GUS* denotes the same *GUS* reporter driven by a Z-box mutated version of the *STOMAGEN* promoter. Seedlings were grown in darkness for 3 days and were exposed to light for 0, 4 and 8 h before harvest. Scale bar, 0.4 mm. (b) Gene expression analyses of the *GUS* transcript of the *GUS* reporter lines in (a) by RT-qPCR. Four dpg seedlings were grown in darkness and were exposed to light for 0, 4 and 8 h before harvest and RNA extraction. Values are mean  $\pm$  SEM,  $n = 2$  biological replicates (each assayed with 3 technical replicates). Two-way ANOVA with Tukey's multiple comparisons test,  $p < 0.05$ .



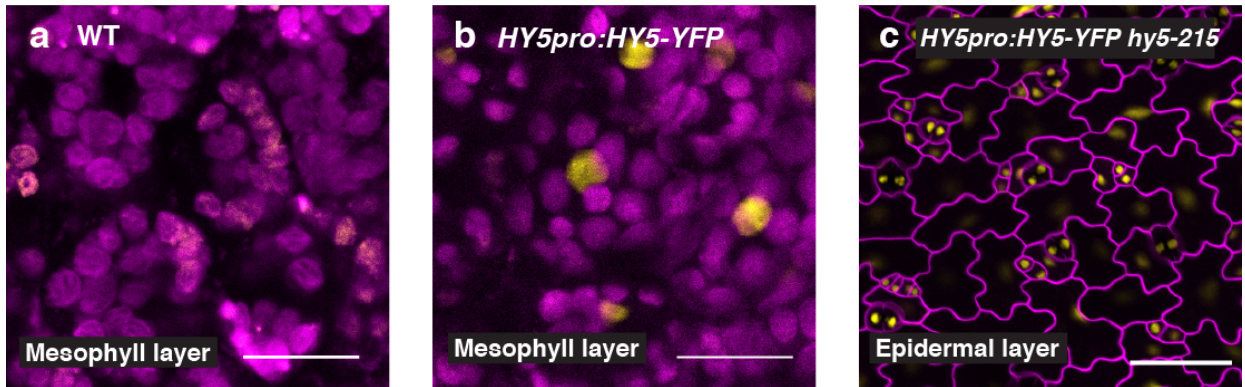

d

**Supplementary Fig. 8. Expression pattern of a translational reporter of *HY5* in mesophyll and the epidermis.** (a, b) Confocal analysis of the mesophyll layer of 3-day-old abaxial cotyledons of WT (a) and *HY5pro:HY5-YFP* (b) grown under standard conditions. (c) Confocal analysis of the epidermis of 3-day-old abaxial cotyledons of *HY5pro:HY5-YFP*. Yellow: YFP signals (a-c), Magenta: Chloroplasts' auto-fluorescence (a, b), cell outline (c). Scale bar, 20  $\mu\text{m}$  (a, b), 50  $\mu\text{m}$  (c). Three cotyledons of the above genotypes were examined with similar results.

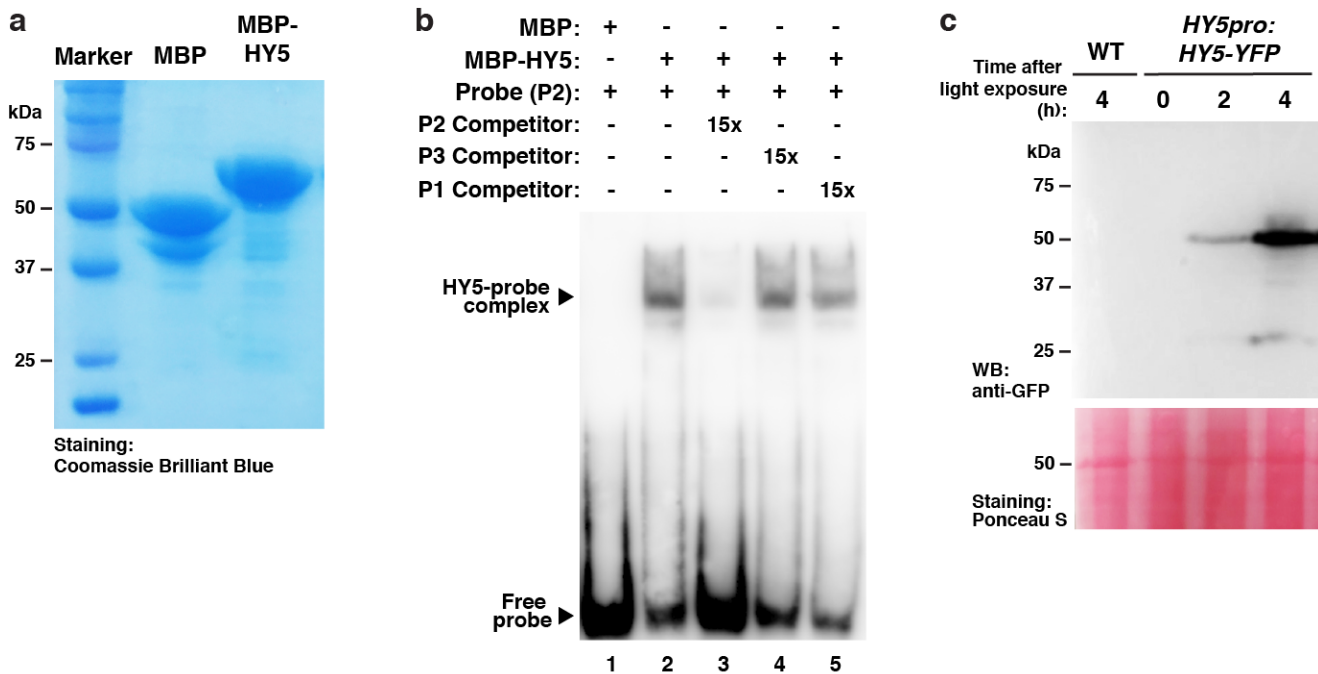

**Supplementary Fig. 9. Purification of recombinant HY5 proteins, additional EMSA assay of HY5 and expression dynamics of *HY5pro:HY5-YFP* during dark to light transition.** (a) Recombinant Maltose-Binding Protein (MBP) and MBP-tagged HY5 were expressed and purified from *E. coli* (see Methods). Purified proteins were analyzed on SDS-PAGE and stained with Coomassie Brilliant Blue. (b) EMSA analysis showing the effectiveness of different regions of the *STOMAGEN* promoter in interfering the binding of HY5 to the P2 fragment of the *STOMAGEN* promoter. Recombinant MBP-HY5 was assayed for binding with the biotin-labelled P2 probe (lane 1 and 2; refer to Fig. 3d, e). Un-labelled competitors (P2, P1 and P3) (see Fig. 3d) was used to compete against this binding (lane 3-5). (c) Expression of *HY5pro:HY5-YFP* during dark to light transition. Seedlings of WT and *HY5pro:HY5-YFP* were grown in darkness for 4 days and were exposed to light for 0, 2 and 4 h before harvest. Total proteins were extracted and western blot analysis was carried out using an anti-GFP antibody (Cell Signaling Technology, #2956). Ponceau S staining of the total blotted proteins was served as loading controls. The SDS-PAGE analysis of the purified proteins in (a) was carried out one time. The experiments in (b) and (c) were repeated two times with similar results.

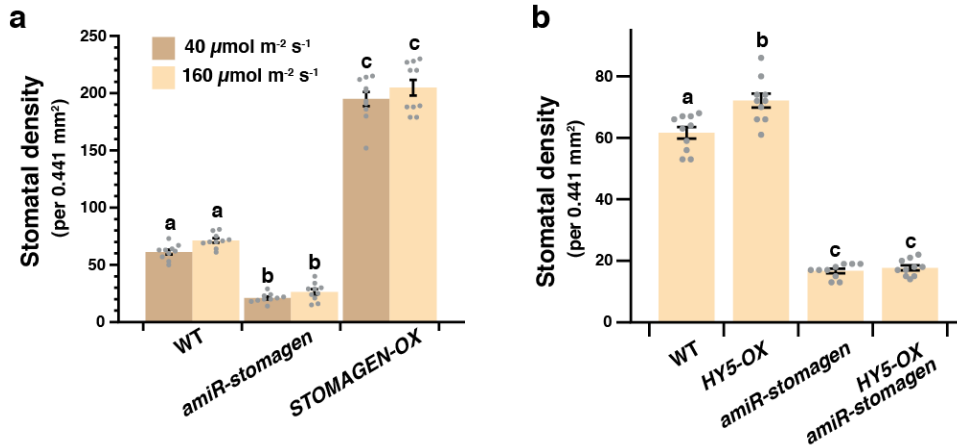

**Supplementary Fig. 10. Density of stomata in WT, *stomagen* and *hy5* mutants.** (a) Quantification of the density of stomata in 10-day-old wild-type (WT), *amiR-stomagen* and *STOMAGEN-OX* abaxial cotyledons grown under low or high light (40 and 160  $\mu\text{mol m}^{-2} \text{s}^{-1}$ , respectively) using the same plant samples as in Fig. 5g. (b) Quantification of the density of stomata in wild-type (WT), *HY5-OX*, *amiR-stomagen* and *HY5-OX amiR-stomagen* abaxial cotyledons grown for 10 days using the same plant samples as in Fig. 5l. Values are mean  $\pm$  SEM,  $n = 10$  independent cotyledons. Two-way (a) and one-way (b) ANOVA with post-hoc Tukey HSD,  $p < 0.01$ .

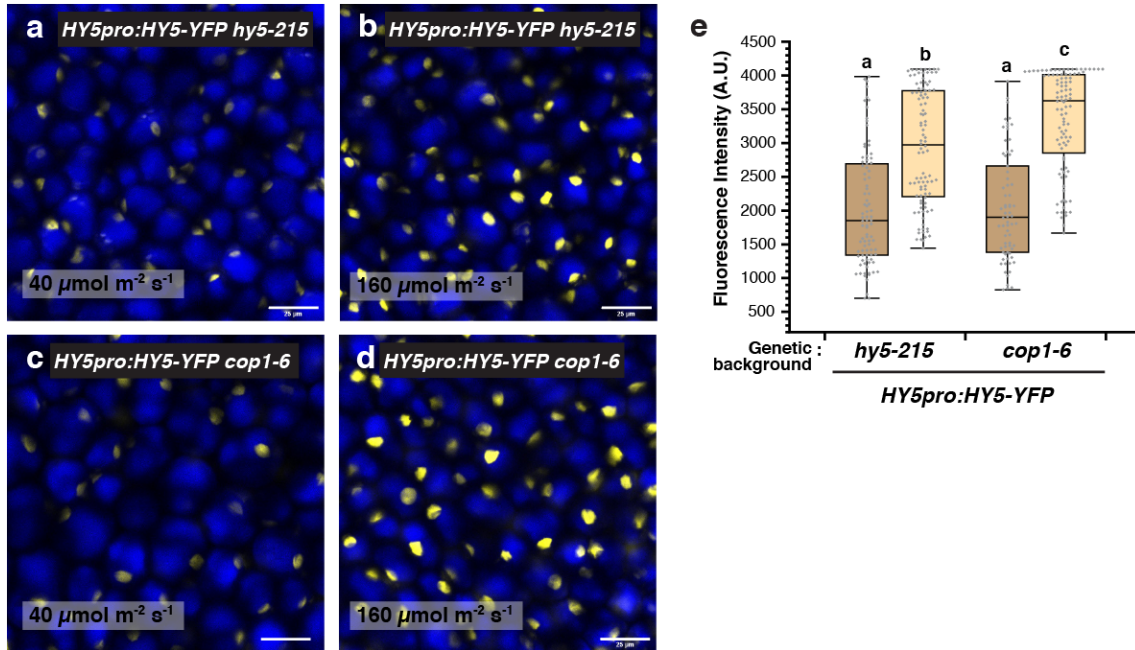

**Supplementary Fig. 11. Confocal analyses of the mesophyll layer of *HY5pro:HY5-YFP* under low and high light.** (a-d) *HY5pro:HY5-YFP* in either *hy5-215* (a, b) or *cop1-6* (c, d) were grown for 3 days under low or high light ( $40$  and  $160 \mu\text{mol m}^{-2} \text{s}^{-1}$ ). Expression of the *HY5pro:HY5-YFP* in the mesophyll layer were imaged by confocal microscopy. Yellow: YFP signals, Blue: Chloroplasts' auto-fluorescence. Scale bar,  $25 \mu\text{m}$ . (e) Quantification of the intensity of the YFP signals of the above samples. Center line of box plots, median; Box limits, first and third quartiles; Whiskers, minimum and maximum values.  $n = 70$  nuclei. Two-way ANOVA with Tukey's multiple comparisons test,  $p < 0.01$ .

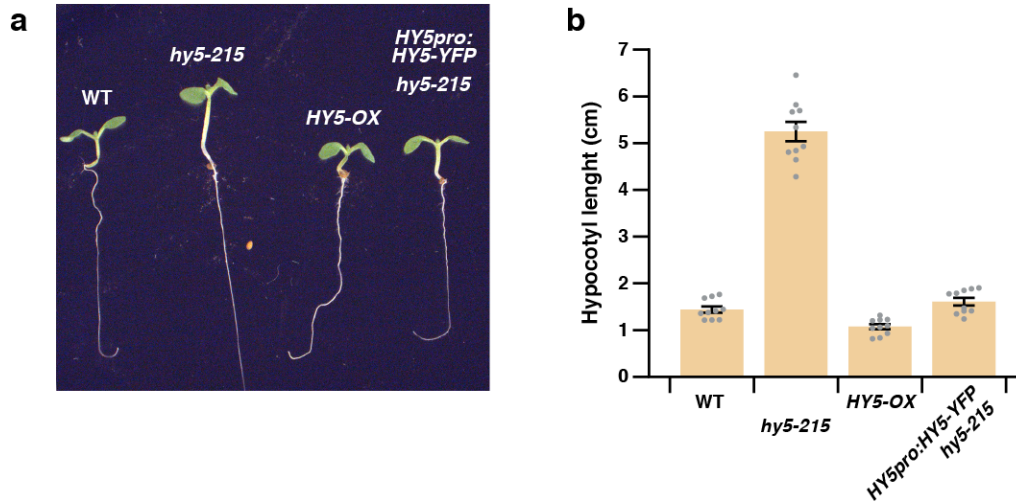

**Supplementary Fig. 12. Phenotypic analyses of hypocotyl growth of WT, *hy5-215*, *HY5-OX* and *HY5pro:HY5-YFP hy5-215*.** (a) Image of 7-day-old seedlings of WT, *hy5-215*, *HY5-OX* and *HY5pro:HY5-YFP hy5-215* grown under low light intensity ( $40 \mu\text{mol m}^{-2} \text{s}^{-1}$ ). (b) Hypocotyl length measurements of the seedlings shown in (a). Values are mean  $\pm$  SEM,  $n = 10$  seedlings.

**Supplementary Table 1. List of primers for RT-qPCR and ChIP-qPCR**

| <b>Primers for RT-qPCR</b> (all written from 5' to 3') |           |                               |                               |                    |
|--------------------------------------------------------|-----------|-------------------------------|-------------------------------|--------------------|
| Gene name                                              | AGI code  | Forward primer                | Reverse primer                | Amplicon size (bp) |
| <i>ACTIN2</i>                                          | AT3G18780 | AAGCTGGGGTTTATGAATGG          | TTGTCACACACAAGTGCATCAT        | 118                |
| <i>PP2A</i>                                            | AT4G12970 | CAAGTGAACCAGGTTATTGGGA        | ATAGCCAGACGTACTCTCCAG         | 101                |
| <i>STOMAGEN</i>                                        | AT4G12970 | TAGGGTCGACAGCACCAACTTGT<br>AC | TCATTTCTTCGACTGGAACCTGC<br>T  | 91                 |
| <i>BASL</i>                                            | AT5G60880 | CCTCTAGACGGAGATGAAGATGG       | CCTGGTGGGCTTAGGCTGAG          | 143                |
| <i>EPF2</i>                                            | AT1G34245 | CGCGTGTTCTTTGGTCGTTAAC        | CCTTCTTGTTGGTGCCTTTGAG        | 113                |
| <i>HYH</i>                                             | AT3G17609 | CAATGGGAACTCGAGTTCGTCTT<br>CT | TGATCCAGCTGCTTCCATGTCAGG<br>A | 100                |
| <i>VENUS</i>                                           | --        | GTAACGGCCACAAGTTCAGCGT<br>G   | TTGCCGGTGGTGCAGATCAGCTT       | 92                 |
| <i>GUS</i>                                             | --        | GTGCTGTGCCTGAACCGTTATTA<br>C  | GGCTAACGTATCCACGCCGTATTC      | 150                |

  

| <b>Primers for ChIP-qPCR</b> (all written from 5' to 3') |                                                   |                                    |                                   |                    |
|----------------------------------------------------------|---------------------------------------------------|------------------------------------|-----------------------------------|--------------------|
| Name in study                                            | Distance from start codon of <i>STOMAGEN</i> (bp) | Forward primer                     | Reverse primer                    | Amplicon size (bp) |
| P1                                                       | -1                                                | CAAACAGGCAAACCTTATCTCTCTC          | TCTCTACTTCTTCTTCTTCTTGCT          | 97                 |
| P2                                                       | -105                                              | ATCTTGTTGGGTTAAAAGTGAAAA<br>CT     | TTTTGTCTTCTACTTATCATCTAAT<br>GGTG | 100                |
| P3                                                       | -215                                              | AACATACTAGAAGAGTTAAATATA<br>TGTTTG | AGAATAAAAAACATTTAACTCTTCT<br>CTTT | 100                |
| 3'                                                       | +2250                                             | TTCAGGCGTTTTTCATGTTC               | CGTATTGAACTAAGATGGATTTAA<br>GC    | 120                |

**Supplementary Table 2. List of probes for EMSAs and DNA pull-down assays**

| Name in study | Distance from start codon of <i>STOMAGEN</i> (bp) | Sequence (from 5' to 3')                                          | Size (bp) |
|---------------|---------------------------------------------------|-------------------------------------------------------------------|-----------|
| P1            | -22                                               | TCTCTCTCCACAACATTTGGTCCATACGATAAAGCAAGAAGAAGAAATTAA<br>GAATTAGAGC | 60        |
| P2            | -119                                              | TCCTCTGTATTTTCAAACCTTATCTCTACGTGTGCACAAACCTCACCATT<br>AGATGATAA   | 60        |
| P3            | -235                                              | ATATGTTTGACCGAAGAAAAATAGAGTTAAATATGTTGTGCTAAAAGGAT<br>AAAGAGAAGA  | 60        |
| mP2           | -119                                              | TCCTCTGTATTTTCAAACCTTATCTCAAAAAATGCACAAACCTCACCATT<br>AGATGATAA   | 60        |
