# Supplementary material for: Light regulates stomatal development by modulating paracrine signaling from inner tissues
Source: PubMed Central journal article supplement (PMC8184810; doi:10.1038/s41467-021-23728-2), 2021-06-07
Supplement: 41467_2021_23728_MOESM2_ESM.pdf [file 41467_2021_23728_MOESM2_ESM.pdf]

## Reporting Summary

Nature Research wishes to improve the reproducibility of the work that we publish. This form provides structure for consistency and transparency in reporting. For further information on Nature Research policies, see [Authors & Referees](#) and the [Editorial Policy Checklist](#).

### Statistics

For all statistical analyses, confirm that the following items are present in the figure legend, table legend, main text, or Methods section.

n/a Confirmed

- |                                     |                                     |                                                                                                                                                                                                                                                            |
|-------------------------------------|-------------------------------------|------------------------------------------------------------------------------------------------------------------------------------------------------------------------------------------------------------------------------------------------------------|
| <input type="checkbox"/>            | <input checked="" type="checkbox"/> | The exact sample size ( $n$ ) for each experimental group/condition, given as a discrete number and unit of measurement                                                                                                                                    |
| <input type="checkbox"/>            | <input checked="" type="checkbox"/> | A statement on whether measurements were taken from distinct samples or whether the same sample was measured repeatedly                                                                                                                                    |
| <input type="checkbox"/>            | <input checked="" type="checkbox"/> | The statistical test(s) used AND whether they are one- or two-sided<br><i>Only common tests should be described solely by name; describe more complex techniques in the Methods section.</i>                                                               |
| <input checked="" type="checkbox"/> | <input type="checkbox"/>            | A description of all covariates tested                                                                                                                                                                                                                     |
| <input checked="" type="checkbox"/> | <input type="checkbox"/>            | A description of any assumptions or corrections, such as tests of normality and adjustment for multiple comparisons                                                                                                                                        |
| <input type="checkbox"/>            | <input checked="" type="checkbox"/> | A full description of the statistical parameters including central tendency (e.g. means) or other basic estimates (e.g. regression coefficient) AND variation (e.g. standard deviation) or associated estimates of uncertainty (e.g. confidence intervals) |
| <input type="checkbox"/>            | <input checked="" type="checkbox"/> | For null hypothesis testing, the test statistic (e.g. $F$ , $t$ , $r$ ) with confidence intervals, effect sizes, degrees of freedom and $P$ value noted<br><i>Give <math>P</math> values as exact values whenever suitable.</i>                            |
| <input checked="" type="checkbox"/> | <input type="checkbox"/>            | For Bayesian analysis, information on the choice of priors and Markov chain Monte Carlo settings                                                                                                                                                           |
| <input checked="" type="checkbox"/> | <input type="checkbox"/>            | For hierarchical and complex designs, identification of the appropriate level for tests and full reporting of outcomes                                                                                                                                     |
| <input checked="" type="checkbox"/> | <input type="checkbox"/>            | Estimates of effect sizes (e.g. Cohen's $d$ , Pearson's $r$ ), indicating how they were calculated                                                                                                                                                         |

*Our web collection on [statistics for biologists](#) contains articles on many of the points above.*

### Software and code

Policy information about [availability of computer code](#)

|                 |                                                                                                                                                                                                                                                                     |
|-----------------|---------------------------------------------------------------------------------------------------------------------------------------------------------------------------------------------------------------------------------------------------------------------|
| Data collection | <input type="text" value="Olympus cellSens Dimension and Zeiss Zen Pro"/>                                                                                                                                                                                           |
| Data analysis   | <input type="text" value="Image analysis: Fiji-ImageJ version 2.1.0/1.53g, with the Cell Counter plug-in&lt;br/&gt;Statistical analysis: Microsoft Excel 2018, GraphPad Prism version 6, or an online tool &lt;http://astatsa.com/OneWay_Anova_with_TukeyHSD&gt;"/> |

For manuscripts utilizing custom algorithms or software that are central to the research but not yet described in published literature, software must be made available to editors/reviewers. We strongly encourage code deposition in a community repository (e.g. GitHub). See the Nature Research [guidelines for submitting code & software](#) for further information.

### Data

Policy information about [availability of data](#)

All manuscripts must include a [data availability statement](#). This statement should provide the following information, where applicable:

- Accession codes, unique identifiers, or web links for publicly available datasets
- A list of figures that have associated raw data
- A description of any restrictions on data availability

## Field-specific reporting

Please select the one below that is the best fit for your research. If you are not sure, read the appropriate sections before making your selection.

## Life sciences study design

All studies must disclose on these points even when the disclosure is negative.

|                 |                                                                                                                                                |
|-----------------|------------------------------------------------------------------------------------------------------------------------------------------------|
| Sample size     | Sample size was determined based on general practice in the field. Refer to figure legends and Methods for the sample size number.             |
| Data exclusions | Besides poorly prepared samples and outliers, including the occasional seedlings with stunted growth, no data were excluded from the analyses. |
| Replication     | All attempts of replication were successfully.                                                                                                 |
| Randomization   | Plates containing the seedlings were placed in a random order and seedlings are harvested/analyzed in a random manner.                         |
| Blinding        | We did not use blinding but key experiments were examined/counted by other members of the team.                                                |

## Reporting for specific materials, systems and methods

We require information from authors about some types of materials, experimental systems and methods used in many studies. Here, indicate whether each material, system or method listed is relevant to your study. If you are not sure if a list item applies to your research, read the appropriate section before selecting a response.

### Materials & experimental systems

| n/a                                 | Involvement in the study                             |
|-------------------------------------|------------------------------------------------------|
| <input type="checkbox"/>            | <input checked="" type="checkbox"/> Antibodies       |
| <input checked="" type="checkbox"/> | <input type="checkbox"/> Eukaryotic cell lines       |
| <input checked="" type="checkbox"/> | <input type="checkbox"/> Palaeontology               |
| <input checked="" type="checkbox"/> | <input type="checkbox"/> Animals and other organisms |
| <input checked="" type="checkbox"/> | <input type="checkbox"/> Human research participants |
| <input checked="" type="checkbox"/> | <input type="checkbox"/> Clinical data               |

### Methods

| n/a                                 | Involvement in the study                        |
|-------------------------------------|-------------------------------------------------|
| <input checked="" type="checkbox"/> | <input type="checkbox"/> ChIP-seq               |
| <input checked="" type="checkbox"/> | <input type="checkbox"/> Flow cytometry         |
| <input checked="" type="checkbox"/> | <input type="checkbox"/> MRI-based neuroimaging |

## Antibodies

|                 |                                                                                                                                                                                                                                                                                                                                                                                                                                                                                                                                                                                                                                                                                                                                                                                                                                                                                                                                                                                                                                                                                                                                                                                                                                                                                                                                                                                                                                                            |
|-----------------|------------------------------------------------------------------------------------------------------------------------------------------------------------------------------------------------------------------------------------------------------------------------------------------------------------------------------------------------------------------------------------------------------------------------------------------------------------------------------------------------------------------------------------------------------------------------------------------------------------------------------------------------------------------------------------------------------------------------------------------------------------------------------------------------------------------------------------------------------------------------------------------------------------------------------------------------------------------------------------------------------------------------------------------------------------------------------------------------------------------------------------------------------------------------------------------------------------------------------------------------------------------------------------------------------------------------------------------------------------------------------------------------------------------------------------------------------------|
| Antibodies used | Commercial antibodies used: GFP-Trap magnetic agarose (Chromotek, gtma-10), anti-GFP-HRP (Miltenyi Biotec, 130-091-833), anti-GFP (Cell Signaling Technology, 2956), anti-MBP monoclonal antibody (NEB, E8032S), anti-mouse IgG-HRP (Sigma, A4416) and anti-rabbit IgG-HRP (Cell Signaling Technology, 7074).                                                                                                                                                                                                                                                                                                                                                                                                                                                                                                                                                                                                                                                                                                                                                                                                                                                                                                                                                                                                                                                                                                                                              |
| Validation      | Please refer to the manufacturer pages below for the validation statement. Proper controls (un-tagged WT) were used in the relevant experiments.<br><a href="https://www.chromotek.com/nc/products/detail/product-detail/gfp-trap-magnetic-agarose/">https://www.chromotek.com/nc/products/detail/product-detail/gfp-trap-magnetic-agarose/</a><br><a href="https://www.miltenyibiotec.com/SG-en/products/macs-flow-cytometry/antibodies/primary-antibodies/anti-gfp-antibodies-gg4-2c2-12-10.html#hrp:100-ul">https://www.miltenyibiotec.com/SG-en/products/macs-flow-cytometry/antibodies/primary-antibodies/anti-gfp-antibodies-gg4-2c2-12-10.html#hrp:100-ul</a><br><a href="https://www.cellsignal.com/products/primary-antibodies/gfp-d5-1-xp-rabbit-mab/2956">https://www.cellsignal.com/products/primary-antibodies/gfp-d5-1-xp-rabbit-mab/2956</a><br><a href="https://www.neb.sg/products/e8032-anti-mbp-monoclonal-antibody#Product%20Information">https://www.neb.sg/products/e8032-anti-mbp-monoclonal-antibody#Product%20Information</a><br><a href="https://www.sigmaaldrich.com/catalog/product/sigma/a4416?lang=en&amp;region=SG">https://www.sigmaaldrich.com/catalog/product/sigma/a4416?lang=en&amp;region=SG</a><br><a href="https://www.cellsignal.com/products/secondary-antibodies/anti-rabbit-igg-hrp-linked-antibody/7074">https://www.cellsignal.com/products/secondary-antibodies/anti-rabbit-igg-hrp-linked-antibody/7074</a> |
